# Supplementary material for: Insights into the terahertz response of l-glutamic acid and its receptor
Source: Royal Society of Chemistry journal article supplement (doi:10.1039/d4an00697f), 2024-01-01
Supplement: d4an00697f1.pdf [file d4an00697f1.pdf]

Supporting information for:

**Insights into the terahertz response of L-Glutamic acid and its receptor**

Yu Wu,<sup>a,b,c</sup> Zhongjie Zhu,<sup>\*b</sup> Jinrong Yang,<sup>d</sup> Jie Wang,<sup>b</sup> Te Ji,<sup>b</sup> Huachun Zhu,<sup>b</sup> Weiwei Peng,<sup>b</sup> Min Chen,<sup>a,b</sup> and Hongwei Zhao<sup>\*a,b</sup>

<sup>a</sup> Shanghai Institute of Applied Physics, Chinese Academy of Sciences, Shanghai 201800, China

<sup>b</sup> Shanghai Advanced Research Institute, Chinese Academy of Sciences, Shanghai 201210, China

<sup>c</sup> University of Chinese Academy of Sciences, Beijing 100049, China

<sup>d</sup> East China Normal University, Shanghai 200241, China

\* E-mail address: [zhaohw@sari.ac.cn](mailto:zhaohw@sari.ac.cn) [zhuzj@sari.ac.cn](mailto:zhuzj@sari.ac.cn)

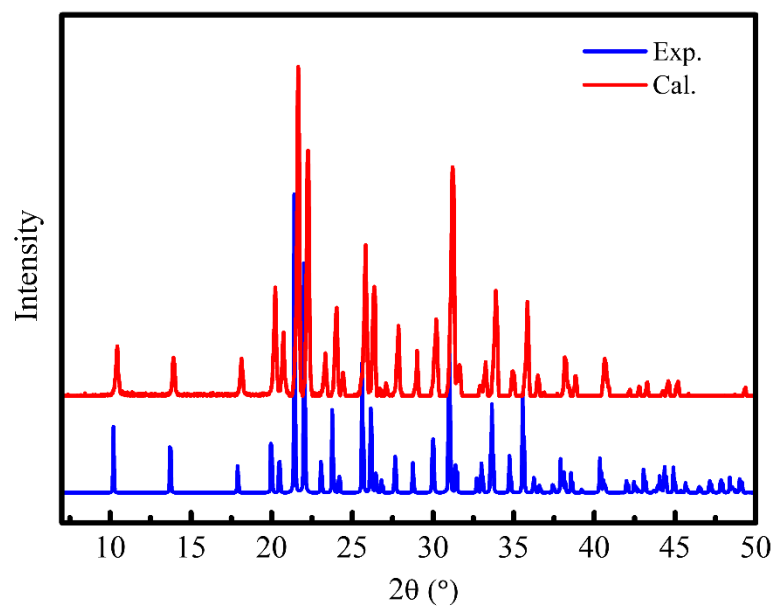

**Fig. S1** The PXRD experimental (blue line) and calculated (red line) spectra of L-Glu.

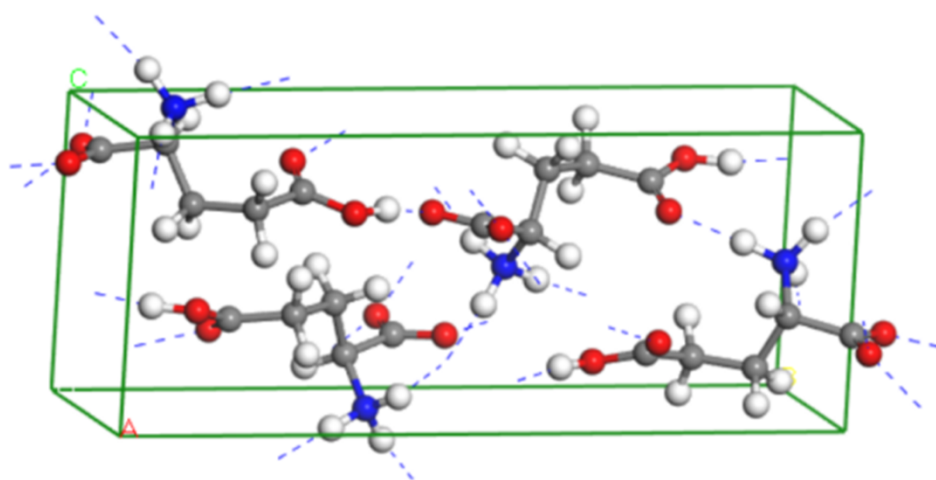

**Fig. S2** Schematic diagram of unit cell structure of L-Glu.

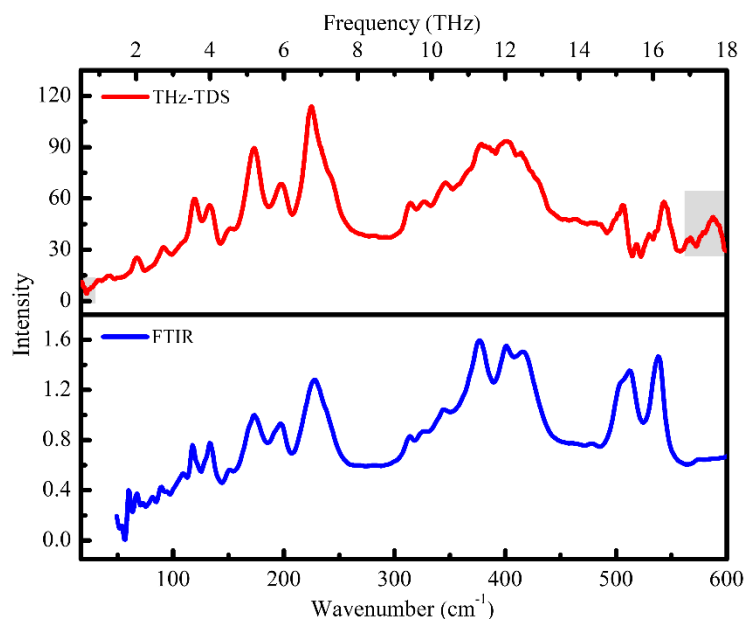

**Fig. S3** THz absorption spectra of L-Glu obtained by THz-TDS (red line) and FTIR (blue line).  
The absorption in the grey area is for reference only.

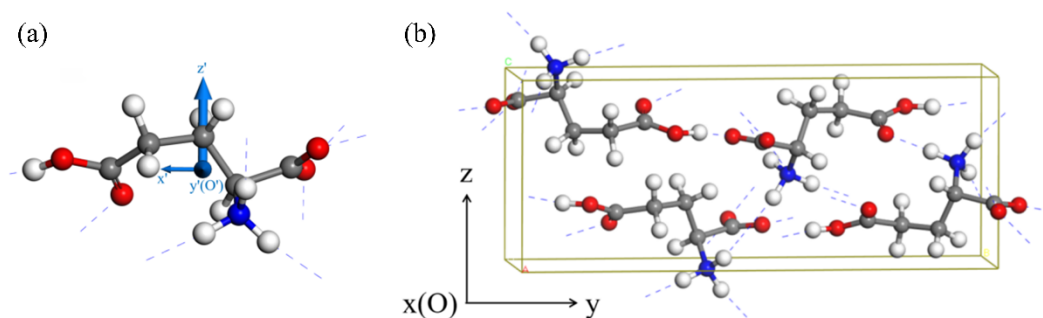

**Fig. S4** (a) The coordinate system determined by the three principal axes of a single L-Glu molecule, and (b) the coordinate system of L-Glu unit cell.

**Table S1** List of surrounding molecules that were included in molecular models used in ONIOM calculation.

|              |              |              |
|--------------|--------------|--------------|
| GLU A 14 MM  | HIS A 88 MM  | SER A 114 MM |
| LEU A 115 MM | THR A 116 MM | ARG A 121 MM |
| VAL A 169 MM | SER A 173 MM | THR A 174 MM |
| GLU A 175 MM | TYR A 214 MM | ASP A 215 MM |
| TYR A 245 MM | HOH A 316 MM | HOH A 320 MM |
| HOH A 321 MM | HOH A 338 MM | HOH A 365 MM |
| GLU A1001 QM |              |              |

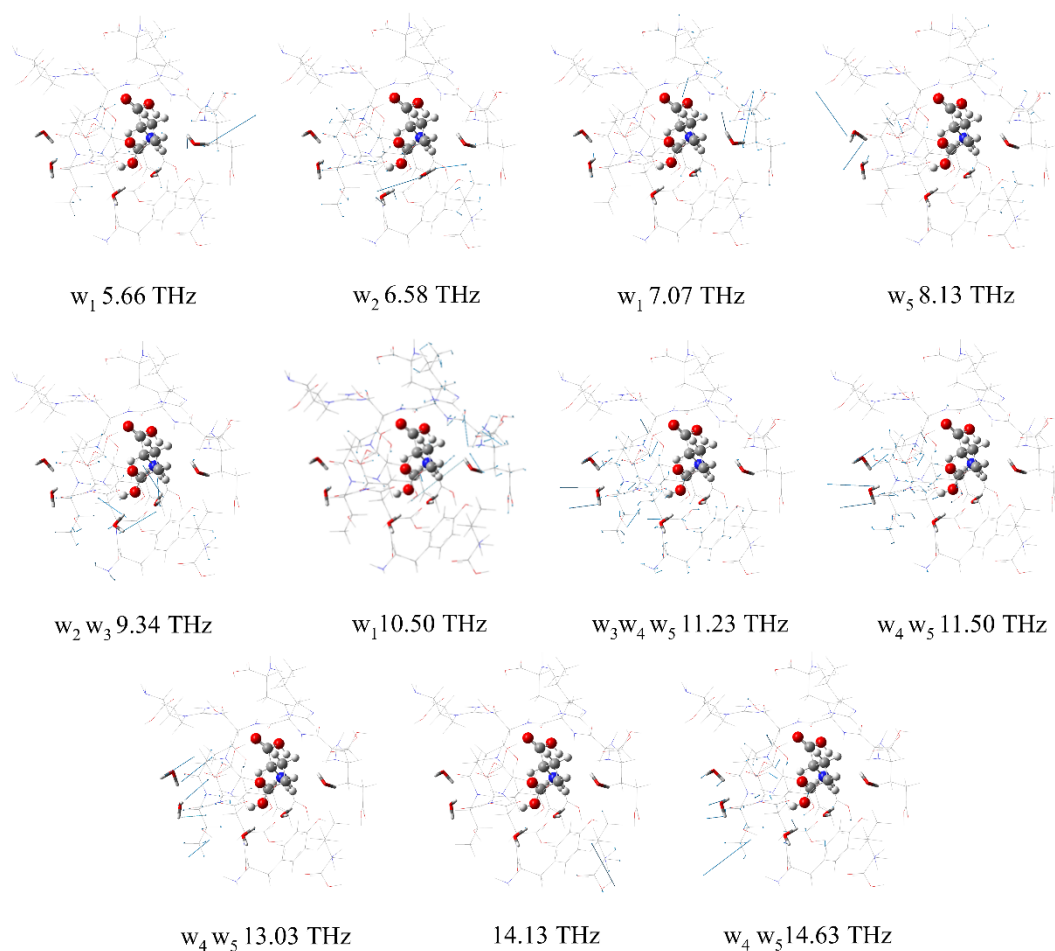

**Fig. S5** Schematic diagram of normal modes of different water molecules in the NMDAR-L-Glu complex at specific frequencies.

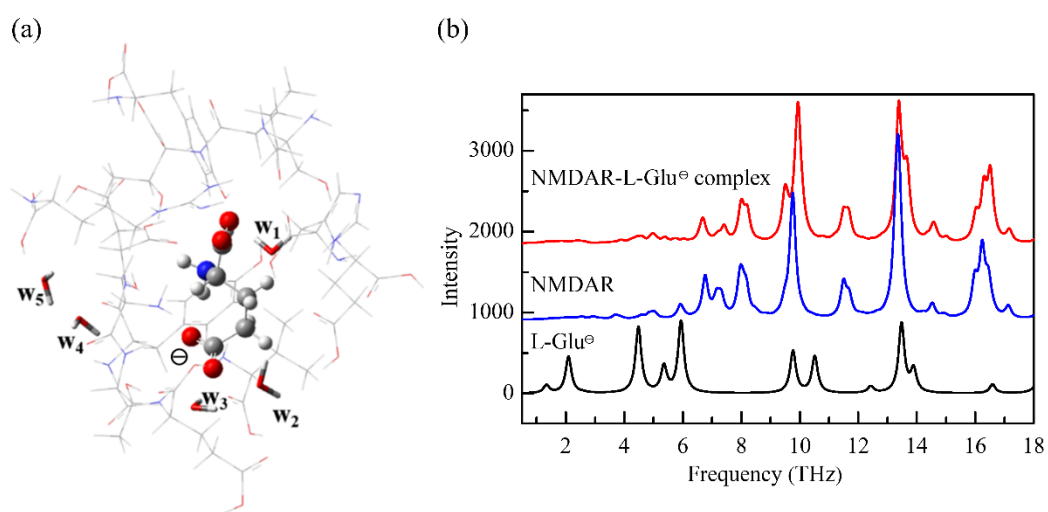

**Fig. S6** (a) Structure diagram of the NMDAR-L-Glu<sup>⊖</sup> complex, where L-Glu<sup>⊖</sup> stands for HOOC-CH(NH<sub>2</sub>)-(CH<sub>2</sub>)<sub>2</sub>-COO<sup>⊖</sup>. (b) THz spectra of NMDAR-L-Glu<sup>⊖</sup> complex and NMDAR and L-Glu<sup>⊖</sup>

in the range of 0.5~18 THz obtained by theoretical calculation, the spectral intensity of L-Glu<sup>⊖</sup> is amplified to 12 times to facilitate comparison.

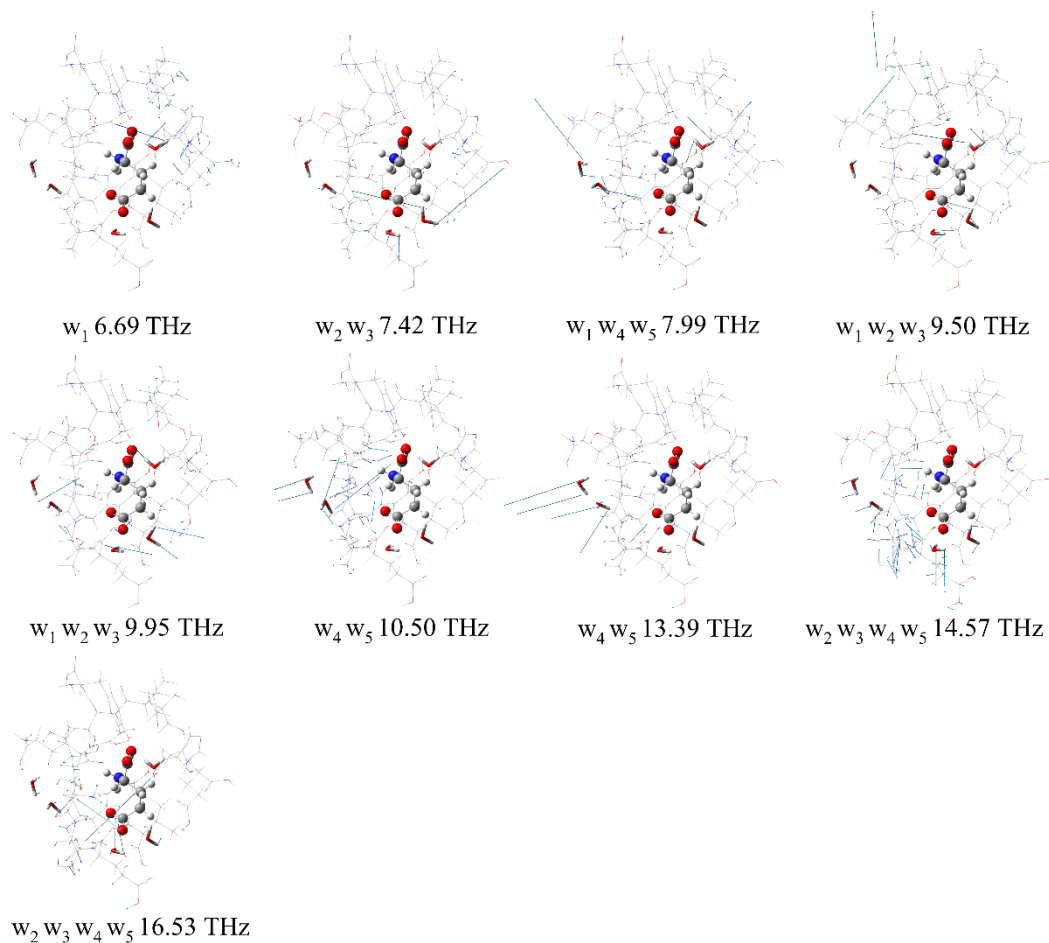

**Fig. S7** Schematic diagram of normal modes of different water molecules in the NMDAR-L-Glu<sup>⊖</sup> complex at specific frequencies.

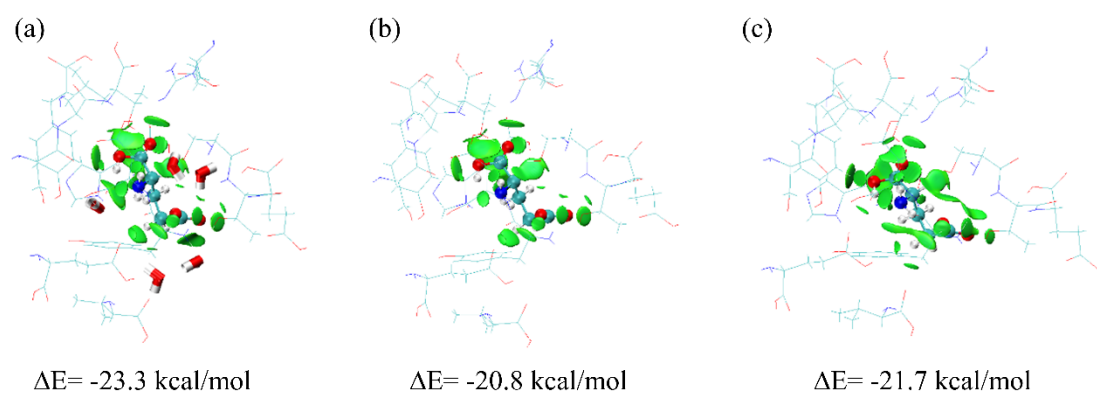

**Fig. S8** Influence of water molecules on the conformation and binding energy of NMDAR-L-Glu<sup>⊖</sup> complex.

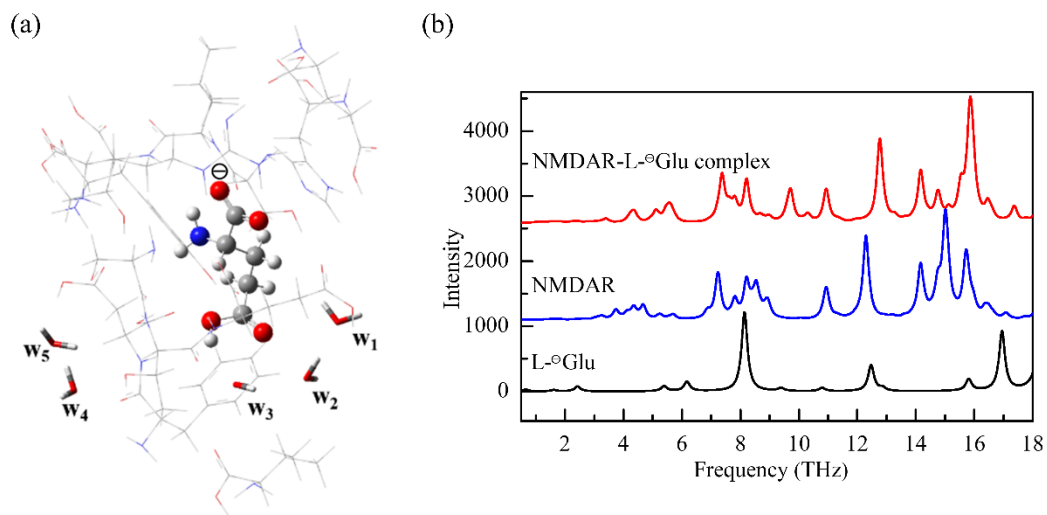

**Fig. S9** (a) Structure diagram of the NMDAR-L-<sup>⊖</sup>Glu complex, where L-<sup>⊖</sup>Glu stands for <sup>⊖</sup>OOC-CH(NH<sub>2</sub>)-(CH<sub>2</sub>)<sub>2</sub>-COOH). (b) THz spectra of NMDAR-L-<sup>⊖</sup>Glu complex and NMDAR and L-<sup>⊖</sup>Glu in the range of 0.5~18 THz obtained by theoretical calculation, the spectral intensity of L-<sup>⊖</sup>Glu is amplified to 7 times to facilitate comparison.

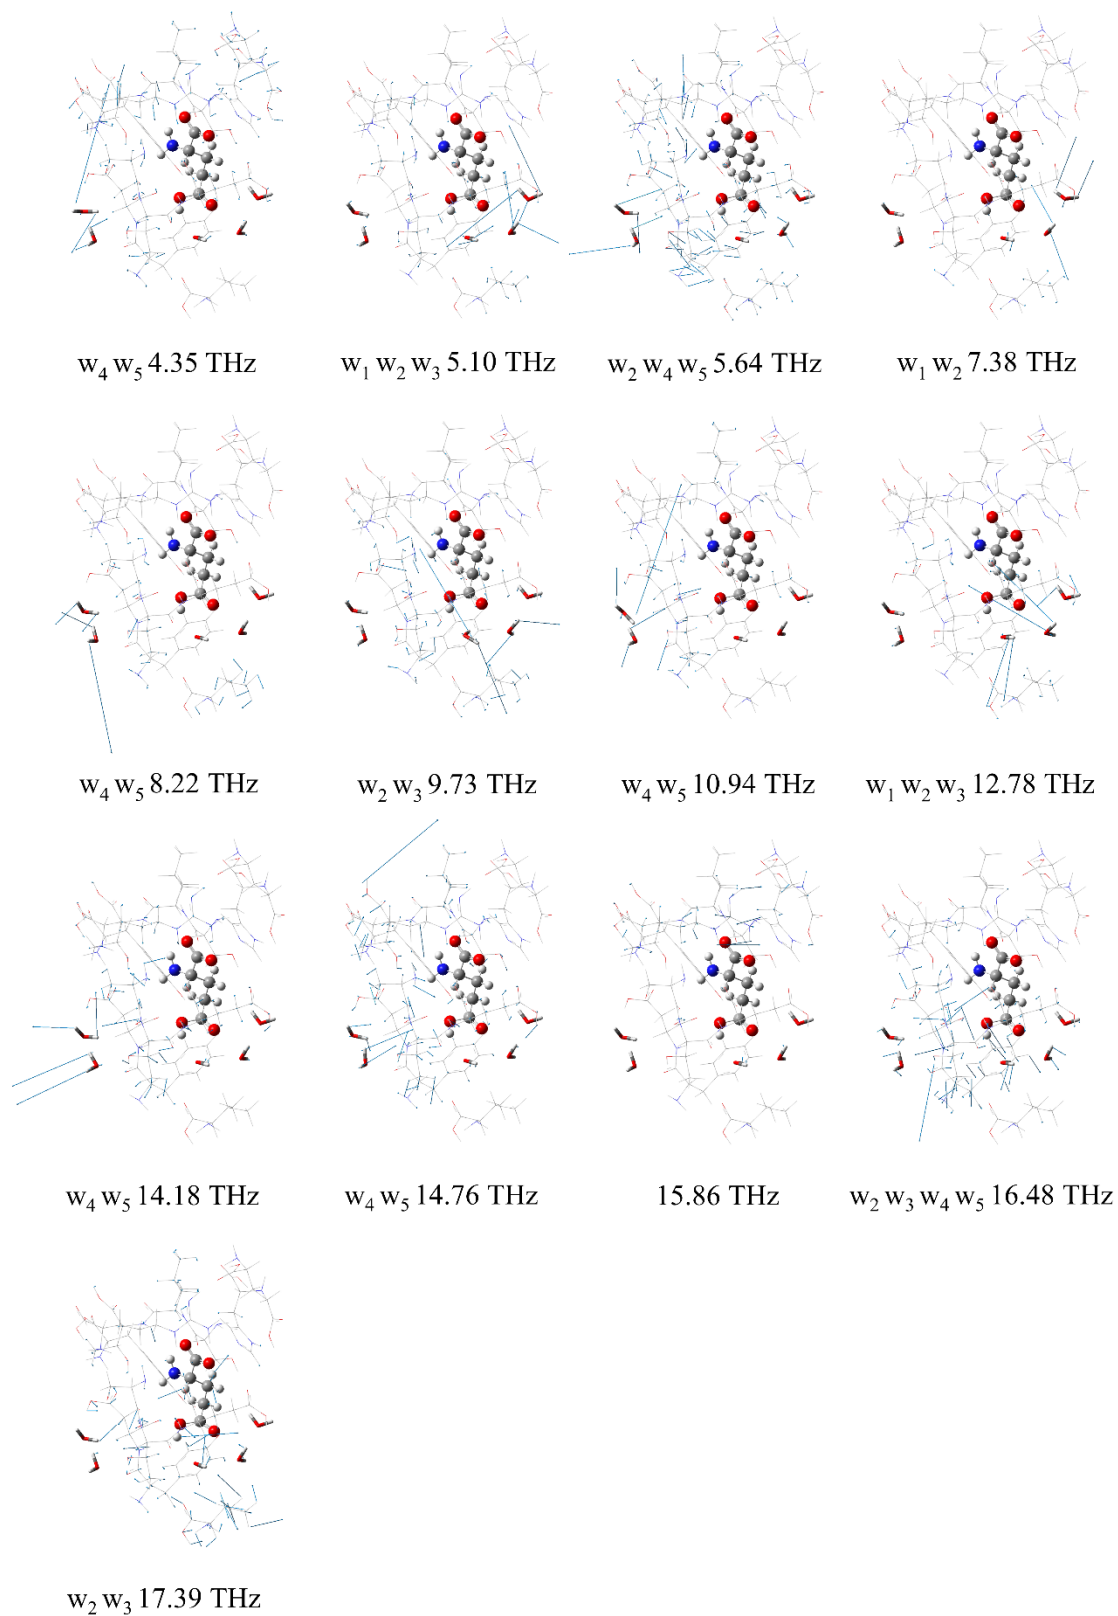

**Fig. S10** Schematic diagram of normal modes of different water molecules in the NMDAR-L- $\ominus$ Glu complex at specific frequencies.

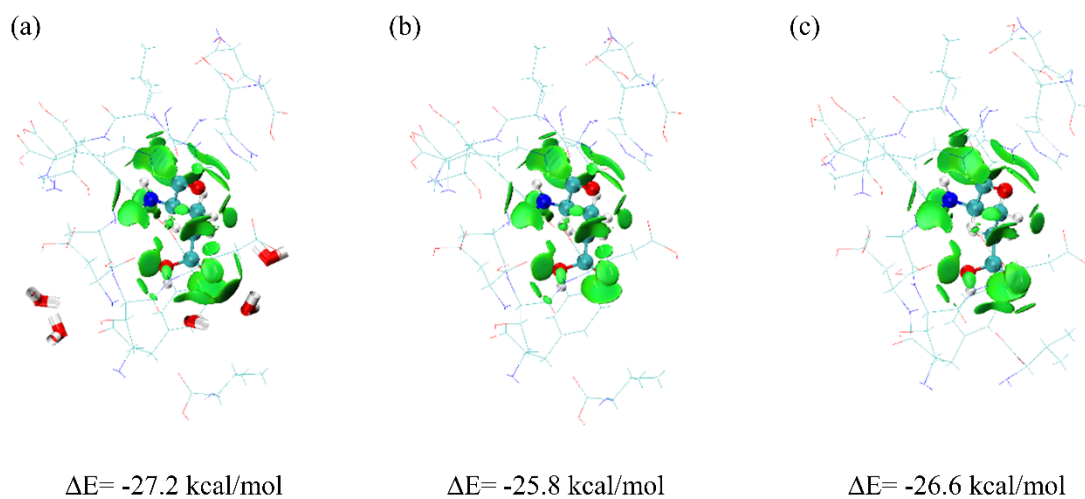

**Fig. S11** Influence of water molecules on the conformation and binding energy of NMDAR-L- $\ominus$ Glu complex.
